# Supplementary material for: Light-based 3D printing and post-treatments of moulds for PDMS soft lithography
Source: Royal Society of Chemistry journal article supplement (doi:10.1039/d4lc00836g), 2025-01-01
Supplement: d4lc00836g1.xlsx [file d4lc00836g1.xlsx]

## Sheet: Feuil1
Database of the post-treatments described in the litterature to eliminate PDMS curing inhibition by 3D printed moulds
Author: Bastien Venzac, LAAS-CNRS (bastien.venzac@laas.fr)
Last version: 27/01/2025
Type of post-treatment	First author	Publication year	Type of publication	DOI	Printer Technology	Printer	Resin	UV Post-curing	Solvent	Baking	Silanisation	Coating	Comments
Baking	Tang	2020		10.1039/D0LC00235F	2-photon polymerization	Nanoscribe PPGT	Nanoscribe IP-S			2h, 200°C
Baking + silanization	Koppaka	2021		10.3390/mi12091005	2-photon polymerization	Nanoscribe PPGT	Nanoscribe IP-S			5min, 190°C	45 min with PFOTCS
No treatment needed	Koroleva	2012		10.1088/1758-5082/4/1/015001	2-photon polymerization	Home-made printer	Envisiontec, E-shell 300
No treatment needed	Soffe	2017		10.1016/j.snb.2017.05.145	2-photon polymerization	Nanoscribe PGGT	Microchip, IP-PH
No treatment needed	Barata	2017		10.1039/C7LC00802C	2-photon polymerization	Nanoscribe PGGT	Nanoscribe IP-L
No treatment needed	Ugrinic	2023		10.1016/j.mee.2022.111898	2-photon polymerization	Nanoscribe PGGT+	Nanoscribe IP-Q
No treatment needed	Lamont	2019		10.1038/s41598-018-36727-z	2-photon polymerization	Nanoscribe PPGT	Nanoscribe IP-S
No treatment needed	Hirschwald	2023		10.1002/admt.202201857	2-photon polymerization	Nanoscribe PPGT2	Nanoscribe IP-S
No treatment needed	Hu	2014		10.1039/C4LC00292J	2-photon polymerization	Nanoscribe	SU8-25
No treatment needed	Kluck	2024		10.1002/advs.202405320	2-photon polymerization	UpNano NanoOne	UpNano UpBrix
Silanization	Jimenez Diaz	2019		10.3390/mi10090576	2-photon polymerization	Nanoscribe PPGT	Nanoscribe IP-S				2h vacuum chamber with PFOCTS
Silanization	Huang	2020		10.1007/s10544-020-00529-w	2-photon polymerization	Nanoscribe PPGT	Nanoscribe IP-S				Silanization with PFOTCS
Baking	Stolovicki	2018		10.1039/C7LC01037K	Material Jetting	Stratasys Objet30	?			overnight 90°C
Baking	Cicolini	2022	Msc thesis	https://webthesis.biblio.polito.it/23802/1/tesi.pdf	Material Jetting	Objet30 Stratasys	Stratasys VeroWhite			Overnight, 110°C
Baking	Segantini	2022		10.3390/s22030969	Material Jetting	Objet30, Stratasys	VeroWhite			12h, 110°C
Baking	Mossoti	2024		10.3390/w16081167	Material Jetting	Stratasys Objet30	VeroWhite			110°C overnight
Baking + silanization	Glick	2016		10.1038/micronano.2016.63	Material Jetting	Stratasys Projet 3000	3D Systems, VisiJet EX200			45 min at 75°C then 1h at 80°C	Vapour deposition of PFOTCS during 30min		For silanization >1h, inhibition of 1mm of PDMS
Baking + silanization	Kim	2023		10.1002/adhm.202301673	Material Jetting	ProJet MJP 2500+	3D Systems, VisiJet M2S-HT90			1) 80°C, 24h	2) O2 Plasma (100W, 1min, 1,2 Torr) then 60 µL of PFOTCS under vacuum at 70°C during 2h
Baking + silanization	King	2014		10.1039/C3LC51072G	Material Jetting	Stratasys Connex 350	Stratasys VeroClear			1) 80°C, 24h	2) vapour silanization with PFOTCS during 1h		80°C above the glass transition of the material
Baking + silanization	King	2014		10.1039/C3LC51072G	Material Jetting	Stratasys Connex 350	Stratasys VeroGrey			1) 80°C, 24h	2) vapour silanization with PFOTCS during 1h
Baking + silanization	King	2014		10.1039/C3LC51072G	Material Jetting	Stratasys Connex 350	Stratasys VeroWhite Plus			1) 80°C, 24h	2) vapour silanization with PFOTCS during 1h
Coating	Guvanasen	2014		10.1109/JMEMS.2014.2341174	Material Jetting	Eden 250	Objet, Transparent FullCure 720					Sputtering of 0,4nm thick gold layer + release spray (Knock out, Slide)
Coating	Chande	2021		10.1142/S2339547820500041	Material Jetting		VeroBlack					SU-8 2002 coating (spin-coating, soft-bake 95°C 1min, UV exposure, developer 1min)
Coating	Hwang	2016		10.1109/JMEMS.2016.2521858	Material Jetting	Stratasys Objet24	VeroWhitePlus					10nm Pt passivation layer with a sputter coater (KIC-1A)
Coating	Cairone	2016		10.1007/s10404-016-1727-0	Material Jetting	Stratasys Object30	VeroWhitePlus 835					drying of a solution of Sokalan (hydrosoluble acrylic acids polymers) on top of the mold
Coating	Hwang	2015		10.1016/j.sna.2015.08.008	Material Jetting	Stratasys Objet24	VeroWhitePlus RGD835					Several coating with different angle of 10nm of AuPd passivation layer with a sputter coater
No treatment needed	Hwang	2016		10.1109/JMEMS.2016.2521858	Material Jetting	Stratasys Projet3510SD	VisiJet Crystal	No treatment
Post-curing	Cutuli	2023		10.3390/mi14112115	Material Jetting	Stratasys Objet260 Connex 1	Stratasys, Vero Purewhite RDG837	1 h, 35°C, no dose
Post-curing + solvent + baking	Tabesh	2023		10.1016/j.mtcomm.2023.106369	Material Jetting	Stratasys Objet260 Connex3		1) 405 nm UV for 10 min at 14 W/cm2	2) IPA + ultrasound, 2h	3) 80°C, 24h
Baking	Venzac	2021		10.1021/acs.analchem.0c04944	Vat photopolymerization	FlashForge Hunter	DWS DL260			1h, 120°C			Alternative baking at 60°C, 24h
Baking	Venzac	2021		10.1021/acs.analchem.0c04944	Vat photopolymerization	FlashForge Hunter	DWS Ds3000			2h, 120°C			Alternative baking at 60°C, 24h
Baking	Venzac	2021		10.1021/acs.analchem.0c04944	Vat photopolymerization	FlashForge Hunter	Envisiontec E-shell 300			1h, 120°C			Alternative baking at 60°C, 24h
Baking	Venzac	2021		10.1021/acs.analchem.0c04944	Vat photopolymerization	FlashForge Hunter	Formlabs Black			1h, 120°C			Alternative baking at 60°C, 24h
Baking	Sanchez	2023		10.3390/s23041897	Vat photopolymerization	Formlabs Forms 3	Formlabs Black resin			Overnight 60°C
Baking	Venzac	2021		10.1021/acs.analchem.0c04944	Vat photopolymerization	FlashForge Hunter	Formlabs Clear (v1)			1h, 120°C			Alternative baking at 60°C, 24h
Baking	Kang	2023		10.1021/acsami.3c00700	Vat photopolymerization	Formlabs Forms 3	Formlabs Clear resin			1h 120°C
Baking	Venzac	2021		10.1021/acs.analchem.0c04944	Vat photopolymerization	FlashForge Hunter	Formlabs Flex (v1)			2h, 120°C
Baking	Venzac	2021		10.1021/acs.analchem.0c04944	Vat photopolymerization	FlashForge Hunter	Formlabs HT (v1)			1h, 120°C			Alternative baking at 60°C, 1h
Coating	Escudero	2023		10.1002/advs.202301499	Vat photopolymerization	DWS 29J+	DWS DL260					SiO2 deposition (15 nm) then PFDTCS
Coating	Olanrewaju	2016		10.1039/C6LC00764C	Vat photopolymerization	Perfactory MicroEDU	Envisiontec HTM140					silicone spray (Ease Release 200) (avoid sticking)
Coating	Mohamed	2019		10.3390/jmmp3010026	Vat photopolymerization	Custom LCD SLA printer	Formlabs Clear GPCL02					Sputtering of 10nm of gold-palladium layer (isolation layer for easy separation)
No treatment found	Hagemann	2024		10.1371/journal.pbio.3002503	Vat photopolymerization	Phrozen sonic mini 4K	Liqcreate Flexible X	no treatment found
No treatment needed	Hwang	2016		10.1109/JMEMS.2016.2521858	Vat photopolymerization	Viper SI	3D systems Accura 60	No treatment
No treatment needed	Hwang	2016		10.1109/JMEMS.2016.2521858	Vat photopolymerization	SL200 (Z rapid)	ZR80	No treatment
Post-curing	Cameron	2022		10.3390/mi13101573	Vat photopolymerization	MiiCraft Ultra 50	Creative CADWorks, Master Mold Resin	60-80min in FormCure (405 nm, 5.5mW/cm2) at RT
Post-curing	Venzac	2021		10.1021/acs.analchem.0c04944	Vat photopolymerization	FlashForge Hunter	DWS GL4000	4h, 14mW/cm2, 405nm, 60°C
Post-curing	Lundquist	2023		10.1109/OJAP.2023.3265691	Vat photopolymerization	Formlabs Forms 3B	Formlabs BioMed Clear	1h, 60°C, FormCure (405 nm, 5.5mW/cm2)
Post-curing	Som Yang	2023		10.1039/D3MH00876B	Vat photopolymerization	Formlabs Form3D	Formlabs Clear /FLGPCL04	15min, RT, FormCure (405 nm, 5.5mW/cm2)
Post-curing	Venzac	2021		10.1021/acs.analchem.0c04944	Vat photopolymerization	FlashForge Hunter	Formlabs Flex (v1)	2h, 14mW/cm2, 405nm, 60°C
Post-curing	Som Yang	2023		10.1039/D3MH00876B	Vat photopolymerization	Formlabs Form3D	Formlabs Surgical Guide/FLSGAM01	15min, RT, FormCure (405 nm, 5.5mW/cm2)
Post-curing	Hagemann	2024		10.1371/journal.pbio.3002503	Vat photopolymerization	Phrozen sonic mini 4K	Phrozen Aqua Gray 4K	60 min in Anycubic Cure (405nm, no dose)
Post-curing	Razavi Bazaz	2019		10.1002/admt.201900425	Vat photopolymerization	Miicraft Ultra 50	Custom resin (Creative CADworks Master Mold resin ?)	405nm, no dose, no duration
Post-curing	Vogt	2022		10.3390/sci4040036	Vat photopolymerization	Formlabs Form 2	Formlabs Black (RS-F2-GPBK-04)	24h (no wavelength, no dose)
Post-curing	Cameron	2022		10.3390/mi13101573	Vat photopolymerization	Formlabs Form2	Formlabs Clear RS-F2-GPCL-04	60 min in FormCure (405 nm, 5.5mW/cm2) at 60°C
Post-curing + baking	Karam	2023		10.1016/j.mfglet.2023.08.110	Vat photopolymerization	3D Systems Figure 4 Standalone printer	3D Systems EGGSHELL-AMB10	2) 90min, no dose		1) 60°C, 1h / 3) 80°C, 30min
Post-curing + baking	Lee	2024		10.1088/1758-5090/ad6cf8	Vat photopolymerization	3D Systems Nextdent 5100	3D Systems Nextdent Ortho Rigid	1) 1 h, no dose (3D Systems, LD-3DPrint Box)		2) 2h, 100°C
Post-curing + baking	Grigorov	2022	Preprint	10.21203/rs.3.rs-1529310/v1	Vat photopolymerization	Phrozen sonic mini 4K	Anycubic Basic	1) 4min at 395nm (no dose)		2) 1h 80°C
Post-curing + baking	Ramasamy	2023		10.1088/1361-6439/acf2a7	Vat photopolymerization	Anycubic Photon D2 DLP	Anycubic black (SKU TL4425)	1) Formcure 30min, 60°C, (405 nm, 5.5mW/cm2)		2) 120°C, 2h
Post-curing + baking	Ye	2023		10.1007/s10544-023-00670-2	Vat photopolymerization	Anycubic Photon Mono X LCD	Anycubic gray UV	1) UV 2h		2) 80°C, 16h
Post-curing + baking	Grigorov	2022	Preprint	10.21203/rs.3.rs-1529310/v1	Vat photopolymerization	Phrozen sonic mini 4K	Anycubic Plant-based	1) 4min at 395nm (no dose)		2) 1h 80°C
Post-curing + baking	Le Gac	2022	Unpublished		Vat photopolymerization	FlashForge Hunter	Anycubic, Plant-based	1) 1h 60°C Formcure (405nm, 5,5mW/cm2)		2) 120°C, 2h
Post-curing + baking	Liu	2023		10.1016/j.sna.2023.114230	Vat photopolymerization	Home-made printer	B9Creations B9R-1-Cherry	1) 1h (no dose)		2) 1h 100°C
Post-curing + baking	Yilmaz	2022	Unpublished		Vat photopolymerization	FlashForge Hunter	BASF Ultracur3D RG 35	1) 1h 60°C Formcure (405nm, 5,5mW/cm2)		2) 120°C, 2h
Post-curing + baking	Yilmaz	2022	Unpublished		Vat photopolymerization	FlashForge Hunter	BASF Ultracur3D ST 45 M	1) 1h 60°C Formcure (405nm, 5,5mW/cm2)		2) 120°C, 2h
Post-curing + baking	Yang	2023		10.1016/j.addma.2023.103580	Vat photopolymerization	Beijing Jindalei Technology	Cyanate custom resin with perfluoropolyether release agent	1) 3 mW/cm2 for 20 minutes		2) 100 °C for 1 hour, 140 °C for 2 hours, 160 °C for 2 hours, 180 °C for 2 hours, and 200 °C for 2 hours			The use of the PTFE release agent improved the PDMS demolding (not proved). BAPO PI
Post-curing + baking	Venzac	2021		10.1021/acs.analchem.0c04944	Vat photopolymerization	FlashForge Hunter	DWS GL4000	1h, 14mW/cm2, 405nm, 60°C		8h, 120°C
Post-curing + baking	Venzac	2021		10.1021/acs.analchem.0c04944	Vat photopolymerization	FlashForge Hunter	DWS GM08	1h, 14mW/cm2, 405nm, 60°C		8h, 120°C			Alternative baking at 60°C, 24h
Post-curing + baking	Grigorov	2022	Preprint	10.21203/rs.3.rs-1529310/v1	Vat photopolymerization	Phrozen sonic mini 4K	Elegoo ABS-like	1) 4min at 395nm (no dose)		2) 2h 80°C
Post-curing + baking	Le Gac	2022	Unpublished		Vat photopolymerization	FlashForge Hunter	Elegoo, Plant-based	1) 1h 60°C Formcure (405nm, 5,5mW/cm2)		2) 120°C, 2h
Post-curing + baking	Venzac	2021		10.1021/acs.analchem.0c04944	Vat photopolymerization	FlashForge Hunter	Envisiontec PIC100	2h, 14mW/cm2, 405nm, 60°C		4h, 120°C
Post-curing + baking	Venzac	2021		10.1021/acs.analchem.0c04944	Vat photopolymerization	FlashForge Hunter	Envisiontec R11	2h, 14mW/cm2, 405nm, 60°C		4h, 120°C
Post-curing + baking	Le Gac	2022	Unpublished		Vat photopolymerization	FlashForge Hunter	eSUN eResin	1) 1h 60°C Formcure (405nm, 5,5mW/cm2)		2) 120°C, 2h
Post-curing + baking	Le Gac	2022	Unpublished		Vat photopolymerization	Forms 3B+	Formlabs BioMed	1) 30min 60°C Formcure (405nm, 5,5mW/cm2)		2) 120°C, 2h
Post-curing + baking	Hu	2023		0.1002/adfm.202313458	Vat photopolymerization	Asiga, Pro 4K80	Formlabs Clear	30 min		120°C, 2h
Post-curing + baking	Byrne	2024		10.1002/biot.202400550	Vat photopolymerization	Formlabs Form 3B	Formlabs Clear resin	15 min, FormCure		3h, 130°C			Baking between jeweler's blocks to reduce warping
Post-curing + baking	Le Gac	2022	Unpublished		Vat photopolymerization	Forms 3B+	Formlabs Clear V4	1) 1h 60°C Formcure (405nm, 5,5mW/cm2)		2) 120°C, 2h
Post-curing + baking	Lee	2023		10.1109/IROS55552.2023.10341491	Vat photopolymerization	Formlabs Form3	Formlabs Clear V4	1) UV 1h		2) 2h 120°C
Post-curing + baking	Ramasamy	2023		10.1088/1361-6439/acf2a7	Vat photopolymerization	Forms 3B	Formlabs Clear V4 (RS-F2-GPCL-04)	1) Formcure 30min, 60°C, (405 nm, 5.5mW/cm2)		2) 120°C, 2h
Post-curing + baking	Khoo	2024		10.1038/s41598-024-68761-5	Vat photopolymerization	Formlabs Form3	Formlabs Clear v4 resin (RS-F2-GPCL-04)	1) Formcure 30min, 60°C, (405 nm, 5.5mW/cm2)		2) 1h 120°C
Post-curing + baking	Chen	2024		10.1016/j.sna.2024.115080	Vat photopolymerization	Formlabs Form 3	Formlabs Durable	1) Formcure, RT, 30min		24h 65°C
Post-curing + baking	Le Gac	2022	Unpublished		Vat photopolymerization	Forms 3B+	Formlabs Elastic 50A	1) 6h 60°C Formcure (405nm, 5,5mW/cm2)		2) 120°C, 48h
Post-curing + baking	Som Yang	2023		10.1039/D3MH00876B	Vat photopolymerization	Form3D (Formlabs)	Formlabs Elastic 50A/ FLELCL01	1) Between 1 and 3 X 15min, RT, FormCure, (405nm, 5,5mW/cm²)		2) 80°C, 8h
Post-curing + baking	Som Yang	2023		10.1039/D3MH00876B	Vat photopolymerization	Form3D (Formlabs)	Formlabs Flexible 80A/ FLFL8001	1) Between 1 and 3 X 15min, RT, FormCure (405nm, 5,5mW/cm²)		2) 80°C, 8h
Post-curing + baking	Byrnes	2024		10.1002/biot.202400550	Vat photopolymerization	Formlabs Form 3B	Formlabs Gray resin	30 min, Formcure		3h, 130°C			Baking between jeweler's blocks to reduce warping
Post-curing + baking	Jóskowiak	2023		0.1007/s00604-023-05924-7	Vat photopolymerization	Formlabs Form 2	Formlabs Grey resin	1) 1h 60°C Formcure (405nm, 5,5mW/cm2)		2) 65°C, 72h
Post-curing + baking	Le Gac	2022	Unpublished		Vat photopolymerization	Forms 3B+	Formlabs High Temp V2	1) 2h 60°C Formcure (405nm, 5,5mW/cm2)		2) 120°C, 4h
Post-curing + baking	Le Gac	2022	Unpublished		Vat photopolymerization	Forms 3B+	Formlabs Surgical Grade	1) 1h 60°C Formcure (405nm, 5,5mW/cm2)		2) 120°C, 2h
Post-curing + baking	Venzac	2021		10.1021/acs.analchem.0c04944	Vat photopolymerization	FlashForge Hunter	FTD Deep Black	15min, 14mW/cm2, 405nm, 60°C		2h, 120°C			Alternative baking at 60°C, 48h
Post-curing + baking	Matic Može	email 16 septembre			Vat photopolymerization		FTD Deep Black	1) 6 min , 365-405nm, 900mW/cm²		2) 100°C, 4h
Post-curing + baking	Venzac	2021		10.1021/acs.analchem.0c04944	Vat photopolymerization	FlashForge Hunter	FTD Industrial Black	15min, 14mW/cm2, 405nm, 60°C		2h, 120°C
Post-curing + baking	Matic Može	email 16 septembre			Vat photopolymerization		FTD Industrial Blend Unpigmented	1) 6 min , 365-405nm, 900mW/cm²		2) 100°C, 4h
Post-curing + baking	Venzac	2021		10.1021/acs.analchem.0c04944	Vat photopolymerization	FlashForge Hunter	FTD Industrial Red	15min, 14mW/cm2, 405nm, 60°C		2h, 120°C			Alternative baking at 60°C, 48h
Post-curing + baking	Venzac	2021		10.1021/acs.analchem.0c04944	Vat photopolymerization	FlashForge Hunter	FTD Standard black	1h, 14mW/cm2, 405nm, 60°C		4h, 120°C
Post-curing + baking	Venzac	2021		10.1021/acs.analchem.0c04944	Vat photopolymerization	FlashForge Hunter	FTD Standard Red	2h, 14mW/cm2, 405nm, 60°C		8h, 120°C
Post-curing + baking	Grigorov	2022	Preprint	10.21203/rs.3.rs-1529310/v1	Vat photopolymerization	Phrozen sonic mini 4K	Phrozen Aqua 4K	1) 4min at 395nm (no dose)		2) 2h 80°C
Post-curing + baking	Memarian	2023		10.3791/64287	Vat photopolymerization	Phrozen sonic mini 8k	Phrozen Aqua Gray 8K	1) 45min, UV (RapidFix)		2) 2h 120°C
Post-curing + baking	Matic Može	email 16 septembre			Vat photopolymerization		Phrozen Aqua Grey 8K	1) 10 min , 365-405nm, 900mW/cm²		2) 100°C, 4h
Post-curing + baking	Dinh	2018		10.1002/admi.201800764	Vat photopolymerization	XYZprinting Da Vinci Nobel 1.0A		UV Post-curing (no dose)		80°C, 24h
Post-curing + baking + coating	Dediu	2022	Conf.	10.1109/CAS56377.2022.9934518	Vat photopolymerization	MiiCraft 50	Creative CADWorks, Master Mold Resin	60 min in Anycubic curing chamber		20h, 65°C		300nm Al Layer by e-beam high vacuum thin film deposition (only for mold with thin PDMS)
Post-curing + baking + coating	Otroshchenko	2022		g/10.1063/5.0122055	Vat photopolymerization	Phrozen sonic mini 4K	Eryone white water washable	1) 10 min, 405nm (no dose)		2) 6h 100°C		3) O2 or N2 plasma during 20min with or without fluoroplastic target
Post-curing + baking + coating	Byrne	2023	Preprint	10.1101/2023.12.06.570409	Vat photopolymerization	Formlabs Form 3B	Formlabs Clear	1) Formcure, 60°C, 15min		2) 2h 130°C		3) Airbrushing of lacquer thinner (Klean-Strip) and clear coat (Finish 1 FC720/FH612), 40µm	Coating mostly to reduce surface roughness?
Post-curing + baking + coating	Byrne	2023	Preprint	10.1101/2023.12.06.570409	Vat photopolymerization	Formlabs Form 3B	Formlabs Grey	1) Formcure, 60°C, 30min		2) 3h 130°C		3) Airbrushing of lacquer thinner (Klean-Strip) and clear coat (Finish 1 FC720/FH612), 40µm	Coating mostly to reduce surface roughness?
Post-curing + baking + coating	Yi	2024		10.1002/aisy.202400394	Vat photopolymerization	Formlabs 3	Formlabs High Temperature	1) 4 h (no dose)		2) 1h 130°C		3) Layer of Dry Film Lubricant (Electrolube)
Post-curing + baking + coating	Otroshchenko	2022		g/10.1063/5.0122055	Vat photopolymerization	Phrozen sonic mini 4K	Phrozen TR250LV	1) 10 min, 405nm (no dose)		2) 6h 100°C		3) O2 or N2 plasma during 20min with or without fluoroplastic target
Post-curing + baking + coating	Otroshchenko	2022		g/10.1063/5.0122055	Vat photopolymerization	Phrozen sonic mini 4K	Resione G217	1) 10 min, 405nm (no dose)		2) 6h 100°C		3) O2 or N2 plasma during 20min with or without fluoroplastic target
Post-curing + baking + coating	Otroshchenko	2022		g/10.1063/5.0122055	Vat photopolymerization	Phrozen sonic mini 4K	Resione HT100	1) 10 min, 405nm (no dose)		2) 6h 100°C		3) O2 or N2 plasma during 20min with or without fluoroplastic target
Post-curing + baking + silanization	Han	2023		10.1021/acsomega.3c02933	Vat photopolymerization	Asiga Pro 4K65	Asiga PlasCLEAR	1) 3min (Asiga UV chamber)		2) autoclave 120°C, 1h	3) oxygen plasma 1 min then vacuum deposition of PFOTCS for 2h
Post-curing + baking + silanization	Wang	2024		10.1039/D4LC00518J	Vat photopolymerization	ASIGA UV Max X2	Asiga PlasCLEAR v2.0	30 min, UV (no dose)		48h, 70°C	PFOTCS during 2h
Post-curing + baking + silanization	Credi	2017		10.1016/j.matdes.2017.07.068	Vat photopolymerization	DWS028JPlus	DWS DL260	1) 15 min, DWS curing unit		3) 100°C 1h	2) air plasma (150W, 60s) then 1% PFDTES in toluene during 1h
Post-curing + baking + silanization	Vedhanayagam	2023		10.3390/mi14081519	Vat photopolymerization	Phrozen Sonic Mini 8k DLP printer	Phrozen Aqua Grey 8K resin	1) UV 30min (Elegoo wash and cure station)		2) 60°C, 1h	3) 600µl of PFOTCS under vacuum during 25min
Post-curing + baking + silanization	Chan	2015		10.1007/s10404-014-1542-4	Vat photopolymerization	Miicraft		10 min (no dose)		130°C, 4h	Oxygen Plasma treatment (3 min) and PFOTCS under vacuum during 30min
Post-curing + baking + silanization	Liu	2022		10.3390/mi13091479	Vat photopolymerization	Anycubic Photon M3 Plus		60 min, UV		2h, 120°C	plasma cleaner (3min) and spin-coating of PFOTCS
Post-curing + coating	Hagemann	2024		10.1371/journal.pbio.3002503	Vat photopolymerization	Anycubic Photon S	Anycubic Clear	60 min in Anycubic curing chamber				<50 µm Enamel paint (Plastikote) using airbrushing (70:30 with water)	OK only for PDMS curing at 75°C, for curing inhibition
Post-curing + coating	Hagemann	2024		10.1371/journal.pbio.3002503	Vat photopolymerization	Anycubic Photon S	Elegoo ABS-like	60 min in Anycubic curing chamber				<50 µm Enamel paint (Plastikote) using airbrushing (70:30 with water)	OK only for PDMS curing at 60 and 90°C
Post-curing + coating	O'Grady	2021		10.1039/D1LC00744K	Vat photopolymerization	Form3	Formlabs Black	60s at 60°C in FormCure				Parylene coating (Lacoter PDS 2010), 18 nm	No version number for resins, probably v4 (Form3), for curing inhibition
Post-curing + coating	O' Grady	2021		10.1039/D1LC00744K	Vat photopolymerization	Form3	Formlabs Clear	60s at 60°C in FormCure				Parylene coating (Lacoter PDS 2010), 18 nm	No version number for resins, probably v4 (Form3)
Post-curing + coating	Som Yang	2023		10.1039/D3MH00876B	Vat photopolymerization	Form3D (Formlabs)	Formlabs Elastic 50A/ FLELCL01	1) Between 1 and 3 X 15min, RT, FormCure, (405nm, 5,5mW/cm²)				parylene-C (thickness: 2 μm, Specialty Coating Systems)
Post-curing + coating	Som Yang	2023		10.1039/D3MH00876B	Vat photopolymerization	Form3D (Formlabs)	Formlabs Flexible 80A/ FLFL8001	1) Between 1 and 3 X 15min, RT, FormCure (405nm, 5,5mW/cm²)				parylene-C (thickness: 2 μm, Specialty Coating Systems)
Post-curing + coating	O' Grady	2021		10.1039/D1LC00744K	Vat photopolymerization	Form3	Formlabs Grey	60s at 60°C in FormCure				Parylene coating (Labcoter PDS 2010)	No version number for resins, probably v4 (Form3)
Post-curing + coating	O' Grady	2021		10.1039/D1LC00744K	Vat photopolymerization	Form3	Formlabs HT	60s at 60°C in FormCure				Parylene coating (Labcoter PDS 2010)	No version number for resins, probably v4 (Form3)
Post-curing + coating	Hagemann	2024		10.1371/journal.pbio.3002503	Vat photopolymerization	Phrozen sonic mini 4K	Liqcreate Premium Tough	60 min in Anycubic curing chamber				Enamel paint (Plastikote) using airbrushing (70:30 with water)	OK only for PDMS curing at 75°C
Post-curing + coating	Comina	2013		10.1039/C3LC50956G	Vat photopolymerization	MiiCraft Suite	Miicraft proprietary resin	10 min (no dose)				airbrushing of ink (Pentel NN60)
Post-curing + coating	Hagemann	2024		10.1371/journal.pbio.3002503	Vat photopolymerization	Phrozen sonic mini 4K	Phrozen Water washable model gray	60 min in Anycubic curing chamber				Enamel paint (Plastikote) using airbrushing (70:30 with water)
Post-curing + solvent	Tjong	2020	Chips and Tips	https://blogs.rsc.org/chipsandtips/2020/06/12/solvent-extraction-of-3d-printed-molds-for-soft-lithography/?doing_wp_cron=1669736664.9217209815979003906250	Vat photopolymerization	B9 Creator v1.2	B9Creations B9-R2-Black	20 min (no dose)	2x 24h in IPA or EtOH				not working with water and methanol
Post-curing + solvent	Costa	2017		10.1039/C7LC00202E	Vat photopolymerization	Perfactory 3 mini-multi lens	Envisiontec PIC 100	3500 flashes (200W per flashes, 10Hz) in Otoflash G171 (280-700nm)	EtOH, 7h, 37°C (change the bath every 2h)
Post-curing + solvent + silanization	Li	2022		10.1128/spectrum.03233-22	Vat photopolymerization	Anycubic Photon Mono X	Anycubic ???	20min (no dose)	IPA, 6h		air plasma corona (1min) then PFOTES for 3 h
Post-curing + solvent + silanization	Waheed	2017		10.1038/s41598-017-15408-3	Vat photopolymerization	Miicraft +	Miicraft BV003	UV Post-curing, 315-400 nm (5min)	IPA, 6h		air plasma corona (1min) then PFOTES for 3 h
Post-curing + solvent + silanization	Shrestha	2019		10.1016/j.ooc.2020.100001	Vat photopolymerization	MiiCraft Ultra 50	Miicraft BV-007	3 min (steps of 10s), no dose	EtOH, 2h		Oxygen plasma, 2min (Basic Plasma cleaner PDC-002) then vapour deposition of trichloro (1H, 1H, 2H, 2H-perfluoro-octyl) silane during 1,5h under vacuum		Optimization of Waheed protocol - !!! Curing temperature above 45°C created cracks on the molds
Silanization	Zhang	2023		10.1021/acs.langmuir.3c01478	Vat photopolymerization	Anycubic, Photon D2					2h in 1% wt PFOTCS-ethanol
Solvent + baking	Franko	2024		10.1039/D4LC00660G	Vat photopolymerization	Elegoo Saturn 3 Ultra	Anycubic Clear		1) and 3) 15 min in IPA + sonication	2) 1h, 100°C			Negative results for Elegoo ABS-like red, Elegoo standard black, Elegoo plant-based grey, Elegoo water washable, Anycubic black, 3DMaterials SuperFlex, and Nova3D high transparency. First replica has to be discarded
Solvent + baking	Woo	2022		10.1016/j.xpro.2022.101376	Vat photopolymerization	Form 3(+)	Formlabs Clear (RS-F2-GPCL-04)		1) 2h DI water 3) 1h DI water + 0,1% Tween-20	2) 90°C 18h
Solvent + coating	Zhang	2024		10.1007/s00604-024-06654-0	Vat photopolymerization	Shenzhen Small Sample Information Technology X190	Shenzhen Small Sample Information Technology 150S		1) 4h in ethanol			2) Spraying of Ease Release 200

## Sheet: Feuil2
Standard resin+	Anycubic
										Epoxy
										Diacrylate
										Diacrylate
										Epoxy
										Phosphine oxide
Eggshell AMB 10	3Dsystems
								Acrylate
								Ester
								Acrylate
								Acrylate
								Photoinitiator
								Phosphine oxide
B9R-1-Cherry	B9Creations
												Methacrylate
												Phosphine oxide
DL260	DWS
											Acrylate
ABS Like	Elegoo
											Acrylate
											Acrylate
											Acrylate
											Phosphine oxide
PIC100	Envisiontec
										Methacrylate
										Methacrylate
										Phosphine oxide
Clear v4	Formlabs
											Methacrylate + Epoxy
											Methacrylate
											Phosphine oxide
Industrial Blend	FTD										Acrylate
											Diacrylate
											Phosphine oxide
Premium Tough	Liqcreate
											Ester
											Acrylate
											Acrylate
											Methacrylate
											Phosphine oxide
Aqua Grey 8k	Phrozen
										Epoxy + acrylate
										Epoxy + acrylate
										Epoxy
HT100	Resione
											urethane + acrylate
											Acrylate
											Phosphine oxide
VeroWhite + RGD835	Stratasys										Acrylate
											Diacrylate
